# Supplementary material for: Human Engineered Heart Tissue: Analysis of Contractile Force
Source: PubMed Central journal article supplement — Stem Cell Reports. 2016 May 19;7(1):29–42. doi: 10.1016/j.stemcr.2016.04.011 (PMC4944531; doi:10.1016/j.stemcr.2016.04.011), 2016-05-19
Supplement: mmc1.pdf [file mmc1.pdf]

**Stem Cell Reports, Volume 7**

## **Supplemental Information**

### **Human Engineered Heart Tissue: Analysis of Contractile Force**

**Ingra Mannhardt, Kaja Breckwoldt, David Letuffe-Brenière, Sebastian Schaaf, Herbert Schulz, Christiane Neuber, Anika Benzin, Tessa Werner, Alexandra Eder, Thomas Schulze, Birgit Klampe, Torsten Christ, Marc N. Hirt, Norbert Huebner, Alessandra Moretti, Thomas Eschenhagen, and Arne Hansen**

# Supplemental Information

## Supplemental Data

Figure S1. Related to Figure 1.

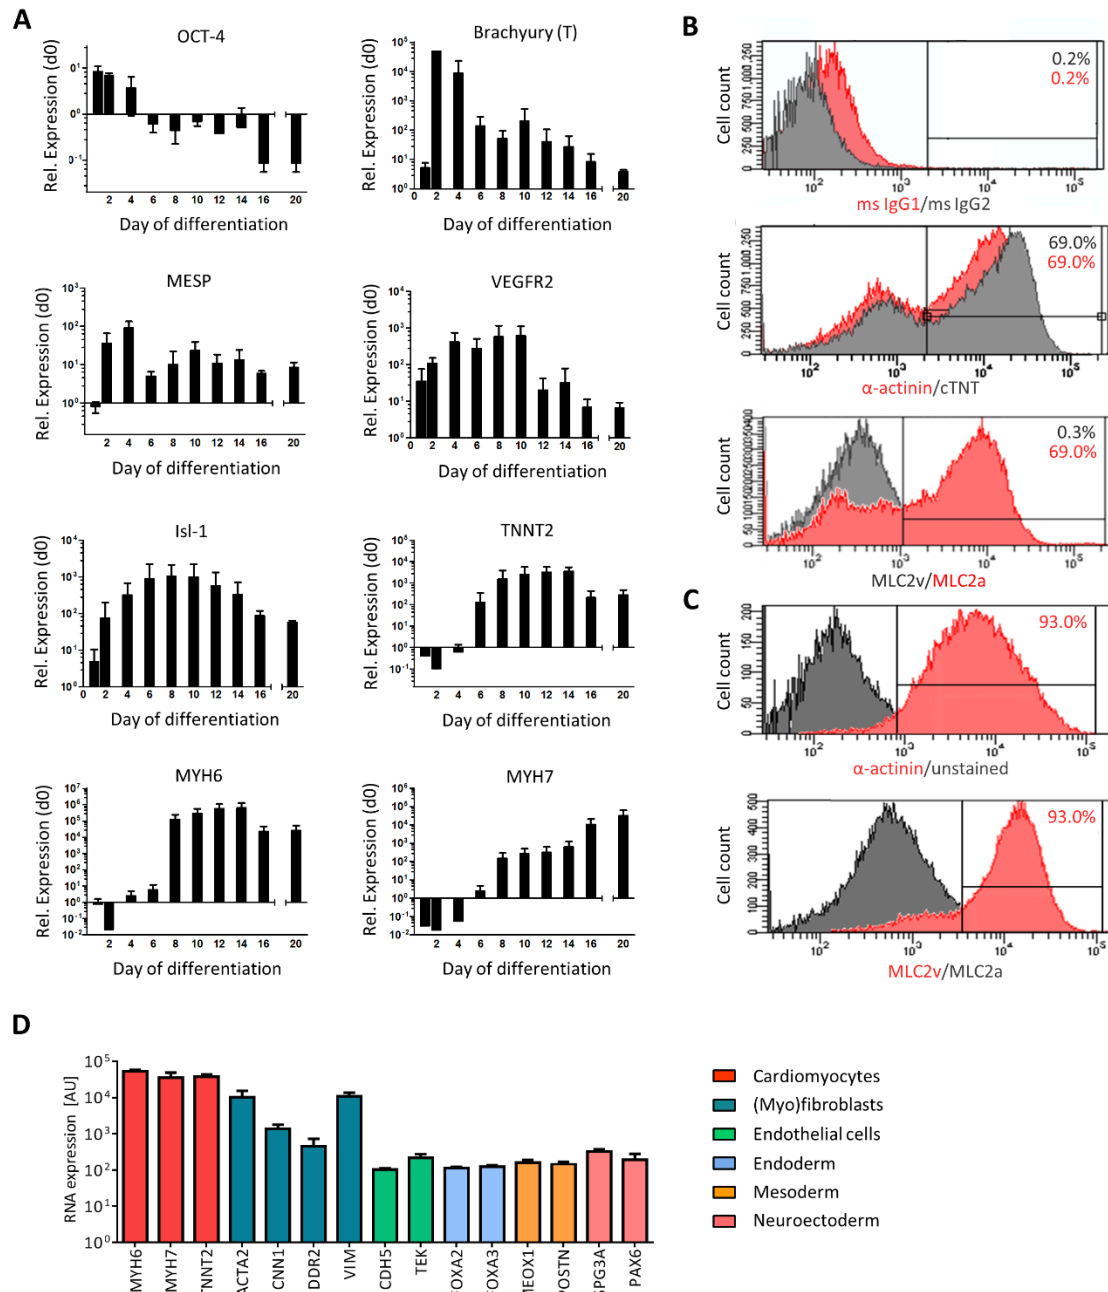

**Figure S1: Cardiac differentiation.** Replicates are indicated as “EHTs/number of independent experiments”, depicted are mean $\pm$ SEM. **A:** Quantitative RT-PCR results showing the relative expression levels of markers of pluripotency, mesoderm, early and late CM development over 20 days of differentiation (n=4/4). Expression levels are normalized to GUSB and expression levels at day 0. **B, C:** Characterization of differentiated cells by FACS analysis. **B:** Cells at the end of differentiation. **C:** Cells isolated from EHT after three weeks in culture. **D:** Characterization of cellular markers at the end (day 21) of differentiation. Relative RNA expression from whole transcriptome analysis for markers of cardiomyocytes, (myo)fibroblasts, endothelial cells, mesoderm, endoderm and neuroectoderm (n=4/1).

**Figure S2. Related to Figure 2.**

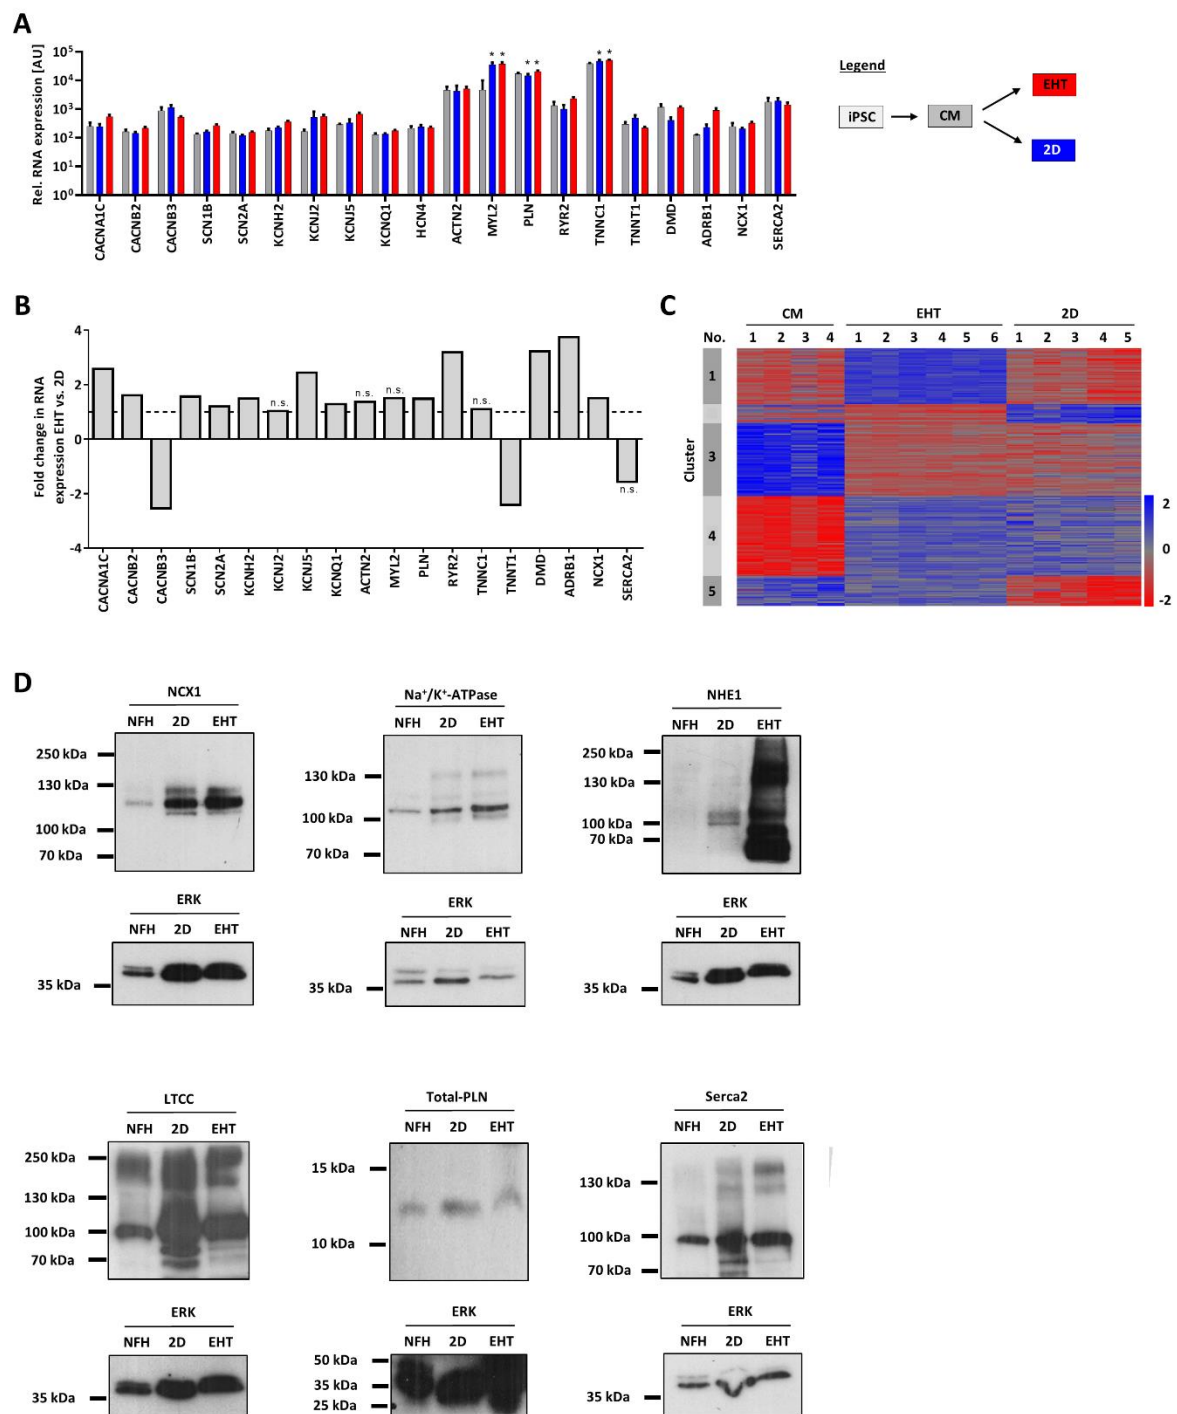

**Figure S2: Expression analyses.** Replicates are indicated as “EHTs/number of independent experiments”. **A-D:** Gene and protein expression analysis comparing cardiomyocytes at the end of differentiation (CM; grey) with those cultivated for 21 more days in 2D (blue) or EHT (red) format (see legend). **A:** Gene expression levels comparing CM, 2D and EHT (Two-way ANOVA with Bonferroni’s post-test; \*  $p < 0.05$  vs. CM;  $n = 4, 5, 6/3$  for CM, 2D, EHT; depicted are mean  $\pm$  SEM). See also Table S1. **B:** Mean fold change in RNA expression in EHT ( $n = 5/3$ ) vs. 2D ( $n = 6/3$ ) for ion channels and cardiac genes. **C:** K-mean cluster analysis. See also Table S2 for functional aspects. **D:** Protein abundance of calcium handling proteins in 2D, EHT and non-failing human heart samples (NFH). Western blot analysis revealed expression of  $\text{Na}^+/\text{Ca}^{2+}$  exchanger-1 (NCX1,  $\sim 120$  kDa),  $\text{Na}^+/\text{K}^+$ -ATPase ( $\sim 112$  kDa),  $\text{Na}^+/\text{H}^+$  exchanger-1 (NHE1;  $\sim 100$  kDa with an additional band at  $\sim 72$  kDa 110-130 (glycosylated), 90 kDa (precursor), 210 kDa dimer), L-type calcium channel ( $\sim 210$  kDa), phospholamban (Total-PLN,  $\sim 12$  kDa) and Serca2 ATPase (SERCA2,  $\sim 110$  kDa). ERK ( $\sim 40$  kDa) was used as loading control.

**Figure S3. Related to Figure 3.**

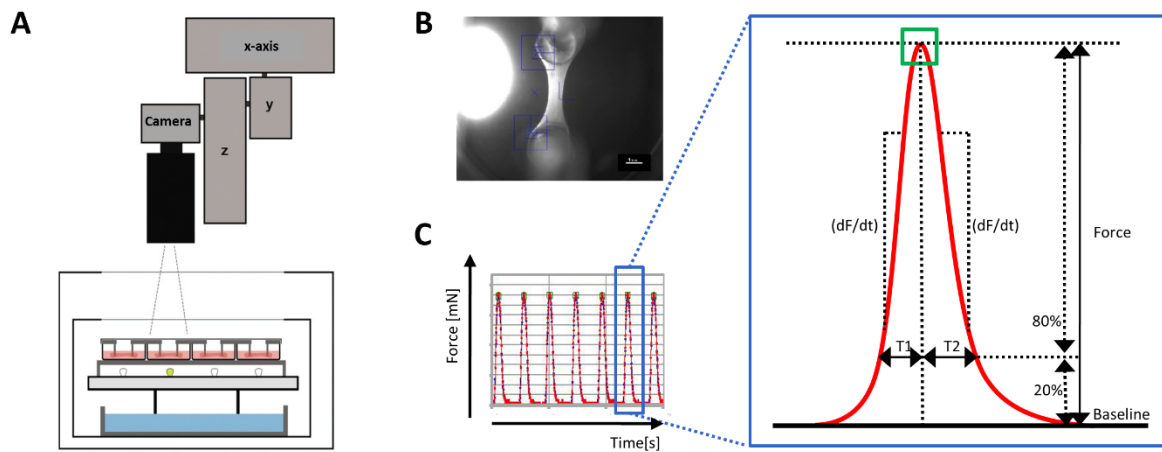

**Figure S3: Contraction analysis of human EHTs. A:** Setup with gas- and temperature-controlled incubation chamber with LEDs, glass top and camera above (adapted from Schaaf et al. 2011). **B:** Live-image of an EHT with depicted figure recognition (blue crosses) during the measurement. **C:** Force-time-diagram showing contraction peaks with contraction time (T1) and relaxation time (T2) at 20% peak height, contraction velocity ( $dF/dt$ ), relaxation velocity ( $dF/dt$ ) and force (green square as quality control for contraction peak identification of customized software).

**Figure S4. Related to Figure 4.**

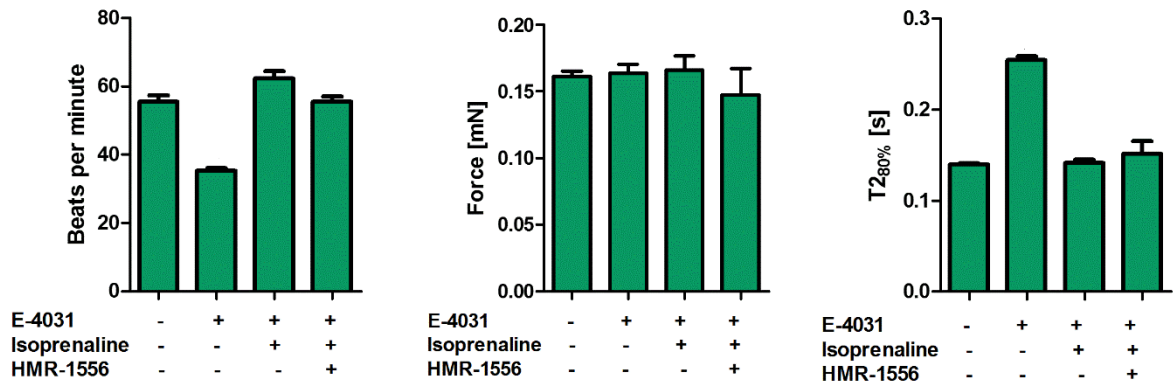

**Figure S4:  $I_{Ks}$ .** Response of spontaneous hiPSC-EHT contractions to  $I_{Ks}$ -inhibitor HMR-1556 (1  $\mu$ M) after  $I_{Kr}$ -inhibition with E-4031 (100 nM) and  $\beta$ -adrenergic stimulation with isoprenaline (10 nM). Change in beating frequency, contraction force and relaxation time  $T2$  in modified Tyrode's solution with 1 mM calcium. Replicates are indicated as "EHTs/number of independent experiments";  $n=4/1$ , depicted are mean $\pm$ SEM.

Figure S5. Related to Figure 3 and Figure 5.

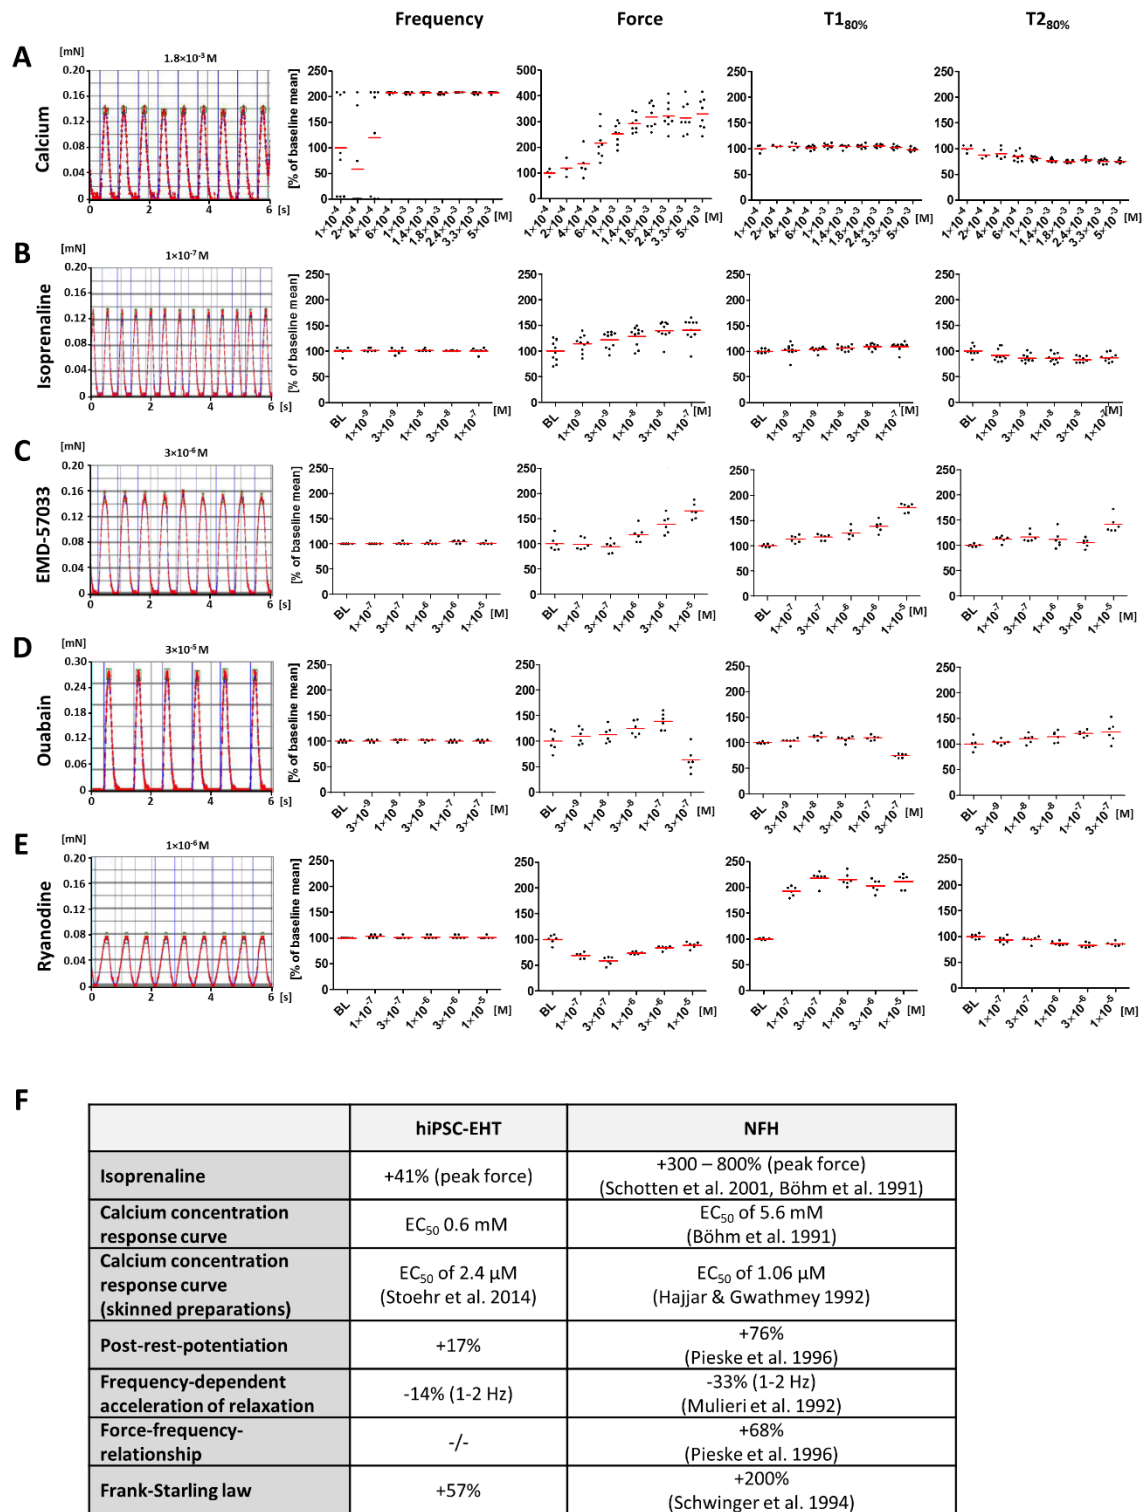

**Figure S5: Pharmacological characterization of hiPSC-EHTs. A-E:** Concentration response curves in modified Tyrode’s solution (0.5-0.6 mM Ca<sup>2+</sup>). Electrical stimulation: 1-2 Hz (blue lines). **Left:** Exemplary original recording of EHT contraction pattern at the indicated concentration. **Right:** Scatter-plot depiction of the concentration-response curve for frequency, force, contraction time (T1) and relaxation time (T2). Replicates are indicated as “EHTs/number of independent experiments”; n=6-10/1-2; data are depicted as scatter plot with mean. **F:** Comparison of effects in hiPSC-EHTs with published values in non-failing heart (NFH) tissue.

**Figure S6. Related to Figure 6.**

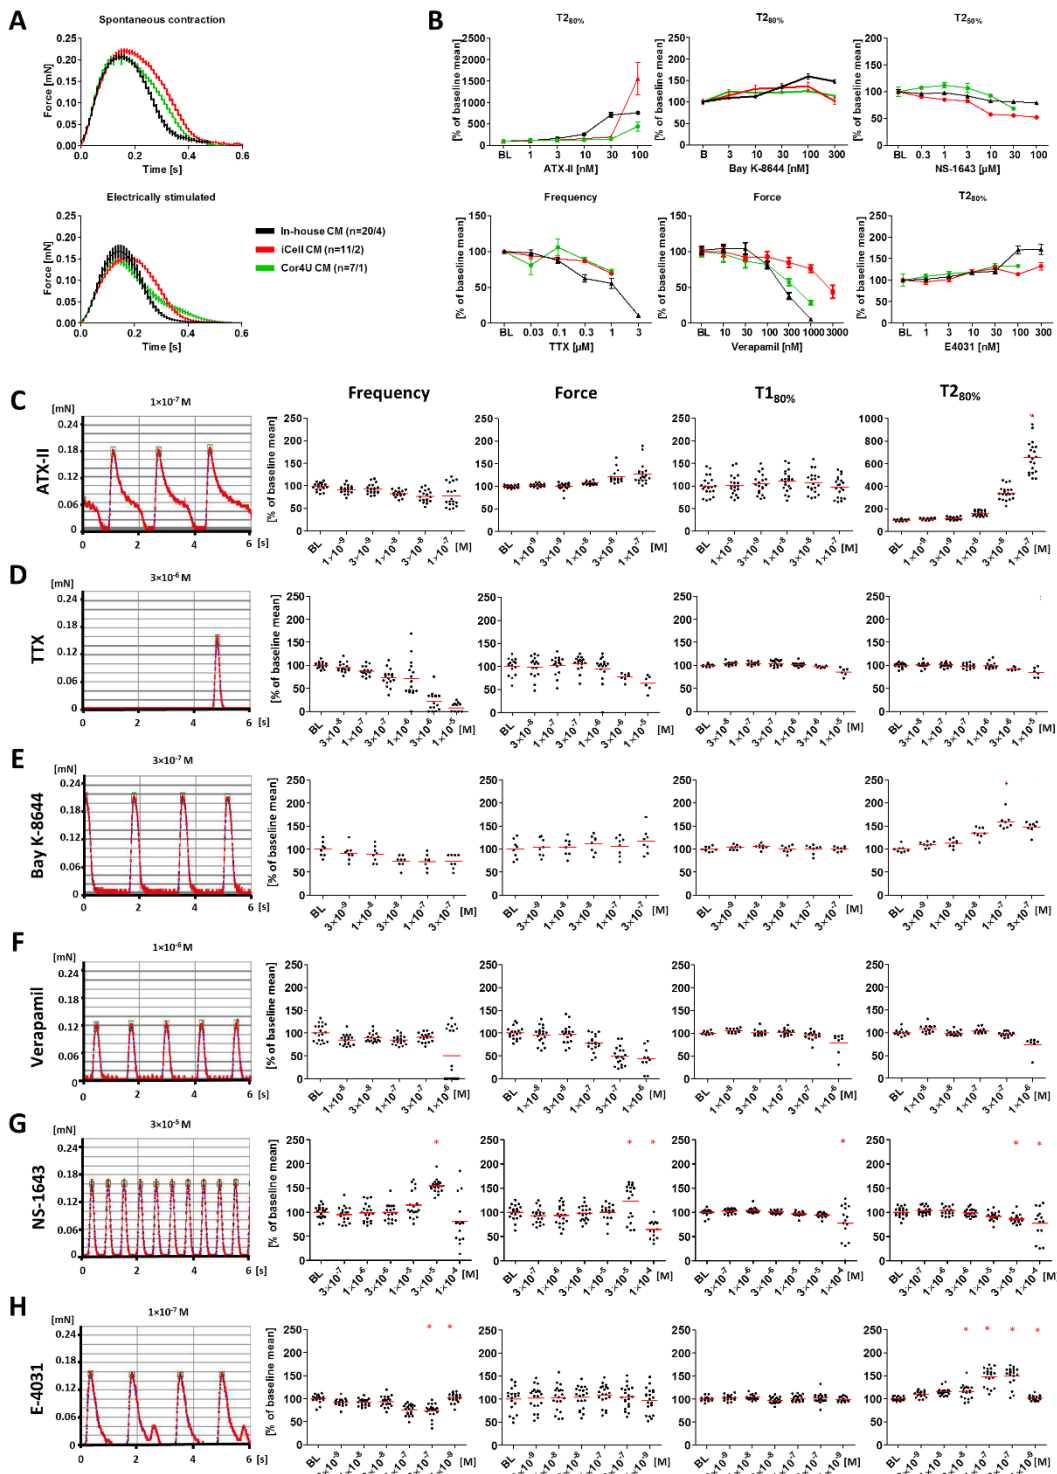

**Figure S6: Pharmacological characterization of hiPSC-EHTs.** **A:** Average contraction peaks (mean±SEM) of spontaneous contracting (top) and electrically stimulated (1.5 Hz; bottom) EHTs. Black: in-house reference CM (n=20/3), red: iCell® CM (n=11/2), green: Cor4U® CM (n=7/1), depicted are mean±SEM. **B:** Concentration response curves in modified Tyrode’s solution (1.8 mM Ca<sup>2+</sup>) for the ion channel modulators introduced in Figure 6 and their effect on the most prominently changed parameter of EHT contraction; depicted are mean±SEM. **C-H:** Concentration response curves in modified Tyrode’s solution (1.8 mM Ca<sup>2+</sup>) as partially displayed in Figure 6. **Left:** Exemplary original recording of EHT contraction pattern at the indicated concentration. **Right:** Scatter-plot depiction of the concentration-response curve for frequency, force, contraction time (T1) and relaxation time (T2). Replicates are indicated as “EHTs/number of independent experiments; n=8-20/2-3; data are depicted as scatter plot with mean. Statistical analysis for experiments with ≥3 independent experiments: One-way ANOVA with Dunnett’s post-test vs. baseline conditions (BL); \*p<0.05.



**Figure S7. Related to Figure 3 and Figure 7.**

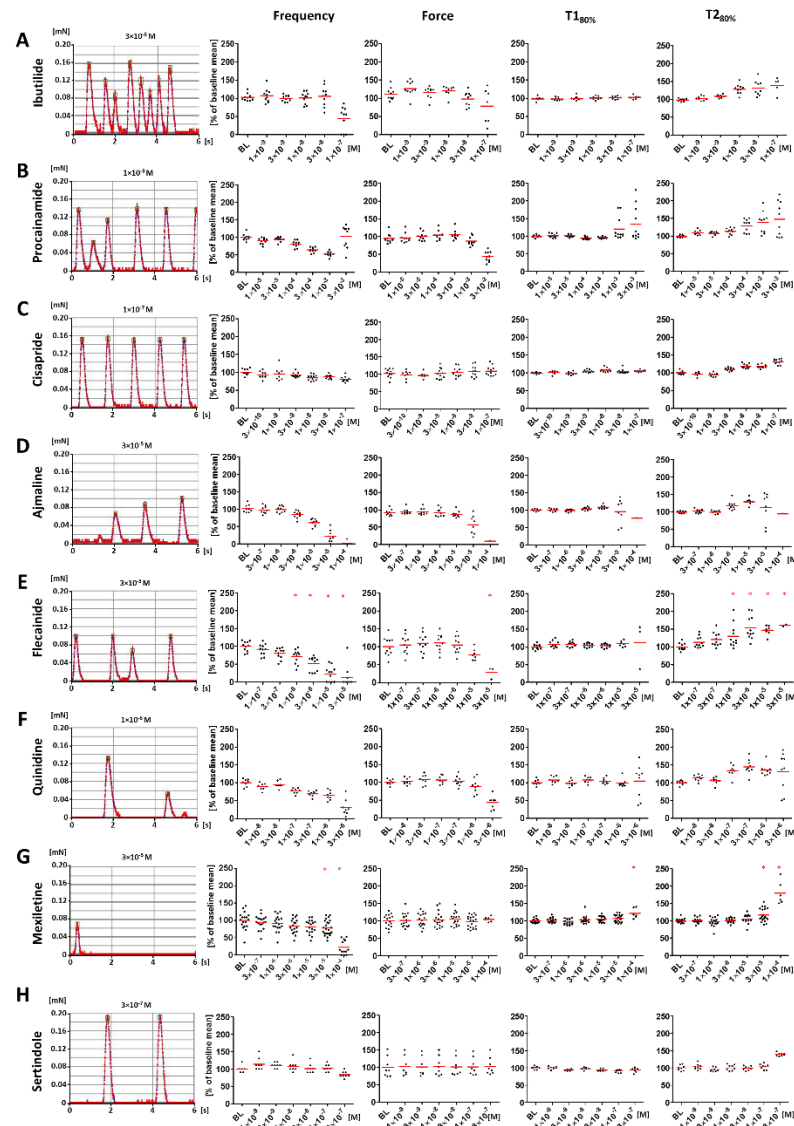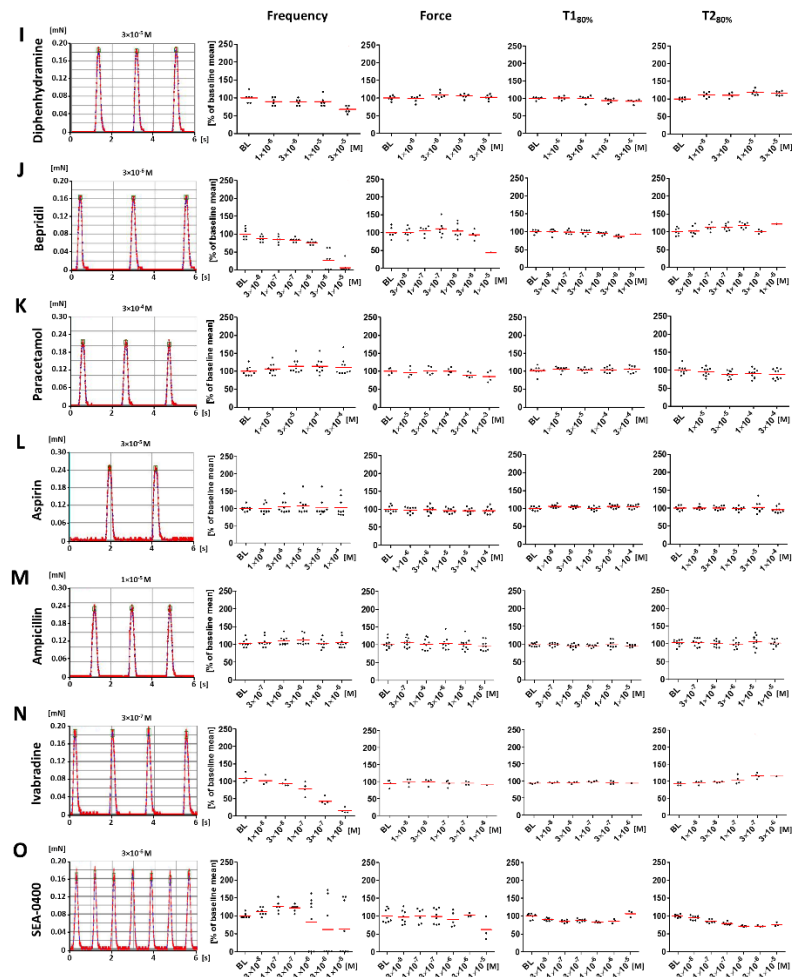

**Figure S7: Pharmacological characterization of hiPSC-EHTs.**

Concentration response curves in modified Tyrode's solution (**A-N**: 1.8 mM  $\text{Ca}^{2+}$ , **O**: 1 mM  $\text{Ca}^{2+}$ ). **Left:** Exemplary original recording of EHT contraction pattern at the indicated concentration. **Right:** Scatter-plot depiction of the concentration-response curve for frequency, force, contraction time (T1) and relaxation time (T2). Replicates are indicated as "EHTs/number of independent experiments"; n=23/1-3; data are depicted as scatter plot with mean. Statistical analysis for experiments with  $\geq 3$  independent experiments: One-way ANOVA with Dunnett's post-test vs. baseline conditions (BL); \*p<0.05.



**Table S1 (see external excel file). Related to Figure 2 and Figure S2.**

Results of transcriptome analysis comparing CM with 21-days older time matched 2D and EHT culture.

**Table S2. Related to Figure 2, Figure S2 and Table S1.**

Enrichment analysis using G:Profiler, with a simulation based analytical threshold for significance estimation. BP = GeneOntology Biological Process; CC = GeneOntology Cellular Component; MF = GeneOntology Molecular Function; ke = KEGG database; mi = miRBase; tf = TransFac; a = annotation; q = query; inters. = intersection.

Source: Cluster 1 of 5: Genes differentially expressed in ANOVA (0.1% FDR; N=57)

| p-value  | Genes in annotation (a) | Genes in query (q) | a inters. q | (a inters. q) / q | (a inters. q) / a | Annotation-id | Database | Title                                                                                                                                                                                                                                                                                                                                           |
|----------|-------------------------|--------------------|-------------|-------------------|-------------------|---------------|----------|-------------------------------------------------------------------------------------------------------------------------------------------------------------------------------------------------------------------------------------------------------------------------------------------------------------------------------------------------|
| 5.00e-02 | 1                       | 10                 | 1           | 0.100             | 1.000             | OMIM:615219   | omi      | HYDROCEPHALUS, NONSYNDROMIC, AUTOSOMAL RECESSIVE 2; HYC2                                                                                                                                                                                                                                                                                        |
| 5.00e-02 | 1                       | 10                 | 1           | 0.100             | 1.000             | OMIM:201300   | omi      | NEUROPATHY, HEREDITARY SENSORY AND AUTONOMIC, TYPE IIA; HSN2A;HSAN IIA;NEUROPATHY, HEREDITARY SENSORY, TYPE IIA; HSN2A;HSN IIA;ACROOSTEOLYSIS, NEUROGENIC;ACROOSTEOLYSIS, GIACCAI TYPE;NEUROPATHY, HEREDITARY SENSORY RADICULAR, AUTOSOMAL RECESSIVE;MORVAN DISEASE;NEUROPATHY, PROGRESSIVE SENSORY, OF CHILDREN;NEUROPATHY, CONGENITAL SENSORY |
| 5.00e-02 | 1                       | 10                 | 1           | 0.100             | 1.000             | OMIM:614492   | omi      | PSEUDOHYPALDOSTERONISM, TYPE IIC; PHA2C                                                                                                                                                                                                                                                                                                         |
| 5.00e-02 | 1                       | 10                 | 1           | 0.100             | 1.000             | OMIM:612313   | omi      | GLASS SYNDROME; GLASS CHROMOSOME 2q32-q33 DELETION SYNDROME                                                                                                                                                                                                                                                                                     |
| 5.00e-02 | 1                       | 10                 | 1           | 0.100             | 1.000             | OMIM:615493   | omi      | MENTAL RETARDATION, AUTOSOMAL RECESSIVE 37; MRT37                                                                                                                                                                                                                                                                                               |
| 5.00e-02 | 1                       | 10                 | 1           | 0.100             | 1.000             | OMIM:614831   | omi      | SPINOCEREBELLAR ATAXIA, AUTOSOMAL RECESSIVE 13; SCAR13                                                                                                                                                                                                                                                                                          |
| 5.00e-02 | 1                       | 10                 | 1           | 0.100             | 1.000             | OMIM:258501   | omi      | 3-METHYLGLUTACONIC ACIDURIA, TYPE III, MGA3;MGA, TYPE III, MGA3;OPTIC ATROPHY PLUS SYNDROME;OPTIC ATROPHY, INFANTILE, WITH CHOREA AND SPASTIC PARAPLEGIA,IRAQI-JEWISH;OPTIC ATROPHY PLUS; COSTIEFF SYNDROME;OPTIC ATROPHY 3, AUTOSOMAL RECESSIVE,OPA3, AUTOSOMAL RECESSIVE                                                                      |
| 5.00e-02 | 1                       | 10                 | 1           | 0.100             | 1.000             | OMIM:165300   | omi      | OPTIC ATROPHY 3, AUTOSOMAL DOMINANT; OPA3;OPTIC ATROPHY AND CATARACT, AUTOSOMAL DOMINANT                                                                                                                                                                                                                                                        |
| 5.00e-02 | 1                       | 10                 | 1           | 0.100             | 1.000             | OMIM:607276   | omi      | RESTING HEART RATE, VARIATION IN;RHR                                                                                                                                                                                                                                                                                                            |

Source: Cluster 2 of 5: Genes differentially expressed in ANOVA (0.1% FDR; N=20)

| p-value  | Genes in annotation (a) | Genes in query (q) | a inters. q | (a inters. q) / q | (a inters. q) / a | Annotation-id | Database | Title                  |
|----------|-------------------------|--------------------|-------------|-------------------|-------------------|---------------|----------|------------------------|
| 5.00e-02 | 1                       | 2                  | 1           | 0.500             | 1.000             | CORUM:2003    | cor      | COX1 HOMODIMER COMPLEX |

Source: Cluster 3 of 5: Genes differentially expressed in ANOVA (0.1% FDR; N=68)

| p-value  | Genes in annotation (a) | Genes in query (q) | a inters. q | (a inters. q) / q | (a inters. q) / a | Annotation-id    | Database | Title                                                |
|----------|-------------------------|--------------------|-------------|-------------------|-------------------|------------------|----------|------------------------------------------------------|
| 5.83e-05 | 181                     | 51                 | 8           | 0.157             | 0.044             | GO:0035966       | BP       | RESPONSE TO TOPOLOGICALLY INCORRECT PROTEIN          |
| 3.57e-05 | 170                     | 51                 | 8           | 0.157             | 0.047             | GO:0006986       | BP       | RESPONSE TO UNFOLDED PROTEIN                         |
| 9.19e-04 | 259                     | 51                 | 8           | 0.157             | 0.031             | GO:0034976       | BP       | RESPONSE TO ENDOPLASMIC RETICULUM STRESS             |
| 8.19e-06 | 141                     | 51                 | 8           | 0.157             | 0.057             | GO:0035967       | BP       | CELLULAR RESPONSE TO TOPOLOGICALLY INCORRECT PROTEIN |
| 4.85e-06 | 132                     | 51                 | 8           | 0.157             | 0.061             | GO:0034620       | BP       | CELLULAR RESPONSE TO UNFOLDED PROTEIN                |
| 4.04e-06 | 129                     | 51                 | 8           | 0.157             | 0.062             | GO:0030968       | BP       | ENDOPLASMIC RETICULUM UNFOLDED PROTEIN RESPONSE      |
| 3.98e-02 | 19                      | 51                 | 3           | 0.059             | 0.158             | GO:0036499       | BP       | PERK-MEDIATED UNFOLDED PROTEIN RESPONSE              |
| 1.33e-02 | 169                     | 24                 | 5           | 0.208             | 0.030             | KEGG:04141       | keg      | PROTEIN PROCESSING IN ENDOPLASMIC RETICULUM          |
| 2.57e-02 | 532                     | 48                 | 8           | 0.167             | 0.015             | MI-hsa-miR-130a* | mi       | MI-HSA-miR-130a*                                     |
| 4.12e-04 | 87                      | 21                 | 5           | 0.238             | 0.057             | REAC:381119      | rea      | UNFOLDED PROTEIN RESPONSE (UPR)                      |
| 9.69e-03 | 28                      | 21                 | 3           | 0.143             | 0.107             | REAC:381042      | rea      | PERK REGULATES GENE EXPRESSION                       |
| 4.00e-02 | 10054                   | 54                 | 38          | 0.704             | 0.004             | TF:M00932_1      | tf       | FACTOR: SPI; MOTIF: NNGGGCGGGGNN; MATCH CLASS: 1     |
| 3.05e-02 | 11319                   | 54                 | 41          | 0.759             | 0.004             | TF:M07354_0      | tf       | FACTOR: EGR-1; MOTIF: GCGGGGGCGG; MATCH CLASS: 0     |
| 4.56e-02 | 5051                    | 54                 | 25          | 0.463             | 0.005             | TF:M03567_1      | tf       | FACTOR: SP2; MOTIF: NYSGCCCGCCCCY; MATCH CLASS: 1    |

Source: Cluster 4 of 5: Genes differentially expressed in ANOVA (0.1% FDR; N=82)

| p-value  | Genes in annotation (a) | Genes in query (q) | a inters. q | (a inters. q) / q | (a inters. q) / a | Annotation-id | Database | Title                                              |
|----------|-------------------------|--------------------|-------------|-------------------|-------------------|---------------|----------|----------------------------------------------------|
| 4.27e-02 | 6363                    | 78                 | 38          | 0.487             | 0.006             | TF:M01072_1   | tf       | FACTOR: HIC1; MOTIF: NSNNNTGCCSSNN; MATCH CLASS: 1 |

Source: Cluster 5 of 5: Genes differentially expressed in ANOVA (0.1% FDR; N=32)

| p-value  | Genes in annotation (a) | Genes in query (q) | a inters. q | (a inters. q) / q | (a inters. q) / a | Annotation-id | Database | Title                                                                                                                                                                                                            |
|----------|-------------------------|--------------------|-------------|-------------------|-------------------|---------------|----------|------------------------------------------------------------------------------------------------------------------------------------------------------------------------------------------------------------------|
| 5.00e-02 | 1                       | 2                  | 1           | 0.500             | 1.000             | OMIM:300376   | omi      | MUSCULAR DYSTROPHY, BECKER TYPE; BMD;BECKER MUSCULAR DYSTROPHY;MUSCULAR DYSTROPHY, PSEUDOHYPERTROPHIC PROGRESSIVE, BECKER TYPE                                                                                   |
| 5.00e-02 | 1                       | 2                  | 1           | 0.500             | 1.000             | OMIM:613152   | omi      | MUSCULAR DYSTROPHY-DYSTROGLYCANOPATHY (CONGENITAL WITHOUT MENTAL RETARDATION),TYPE B, 4; MDDGB4;MUSCULAR DYSTROPHY, CONGENITAL, FKTN-RELATED                                                                     |
| 5.00e-02 | 1                       | 2                  | 1           | 0.500             | 1.000             | OMIM:302045   | omi      | CARDIOMYOPATHY, DILATED, 3B; CMD3B;CARDIOMYOPATHY, DILATED, X-LINKED; XLCM                                                                                                                                       |
| 5.00e-02 | 1                       | 2                  | 1           | 0.500             | 1.000             | OMIM:255800   | omi      | MUSCULAR DYSTROPHY-DYSTROGLYCANOPATHY (CONGENITAL WITH BRAIN AND EYEANOMALIES), TYPE A, 4; MDDGA4;FUKUYAMA CONGENITAL MUSCULAR DYSTROPHY; FCMD;WALKER-WARBURG SYNDROME OR MUSCLE-EYE-BRAIN DISEASE, FKTN-RELATED |
| 5.00e-02 | 1                       | 2                  | 1           | 0.500             | 1.000             | OMIM:611615   | omi      | CARDIOMYOPATHY, DILATED, 1X; CMD1X;CARDIOMYOPATHY, DILATED, WITH MILD OR NO PROXIMAL MUSCLE WEAKNESS                                                                                                             |
| 5.00e-02 | 1                       | 2                  | 1           | 0.500             | 1.000             | OMIM:611588   | omi      | MUSCULAR DYSTROPHY-DYSTROGLYCANOPATHY (LIMB-GIRDLE), TYPE C, 4; MDDGC4;MUSCULAR DYSTROPHY, LIMB-GIRDLE, TYPE 2M; LGMD2M                                                                                          |
| 5.00e-02 | 1                       | 2                  | 1           | 0.500             | 1.000             | OMIM:310200   | omi      | MUSCULAR DYSTROPHY, DUCHENNE TYPE; DMD;DUCHENNE MUSCULAR DYSTROPHY;MUSCULAR DYSTROPHY, PSEUDOHYPERTROPHIC PROGRESSIVE, DUCHENNE TYPE                                                                             |

## Supplemental Experimental Procedures

### *Expansion and differentiation of human induced pluripotent stem cells*

Undifferentiated hiPSC control cell line (Moretti et al. 2010; in the following named “in-house reference”) was expanded on Geltrex® (Gibco, A1413302; 1:200 in DMEM, 37 °C, 30 min) coated 6-well-dishes and T80-flasks in FTDA medium (37 °C, 5% CO<sub>2</sub>, 5% O<sub>2</sub>) as recently published (Frank et al., 2012) with 30 ng/ml FGF2: DMEM/F-12 (Gibco, 21331), 2 mM L-Glutamine (Gibco, 25030), 0.5% penicillin/streptomycin (Gibco, 15140), 5 mg/l transferrin (Sigma, T8158), 5 µg/l selenium (Sigma, S5261), 0.1% human serum albumin (Biopur, 05-720-1B), 1x Lipid-Mix (Sigma-Aldrich, L5146), 5 mg/l insulin (Sigma-Aldrich, I9278), 50 nM dorsomorphin (Tocris, 3093), 2.5 ng/ml activin A (R&D Systems, 338-AC), 0.5 ng/ml human TGFβ1 (PeproTech, 100-21C), 30 ng/ml FGF2 (PeproTech, 100-18B). Cardiomyocytes were differentiated from hiPSC in a three-stage protocol (Figure 1). Confluent hiPSC were incubated with Rho kinase inhibitor Y-27632 (Biaffin, PKI-Y27632-010; 10 µM in FTDA medium) for 1 hour, washed with PBS (Gibco, 14190) twice and dissociated with 0.5 mM EDTA (10 minutes; Roth, 80432). After automated cell counting (CASY® cell counter, OMNI Life Science), cells were transferred to spinner flasks. Embryoid bodies (EBs) were generated during culture of single cell suspension (30×10<sup>6</sup> cells/100 ml) in 250 and 500 ml spinner flasks (FTDA medium with 4 mg/ml polyvinyl alcohol [PVA; Sigma-Aldrich, P8136], 10 µM Y-27632) by stirring at 40 rpm in a gas and temperature controlled incubator (37 °C, 5% CO<sub>2</sub>, 5% O<sub>2</sub>) for 24 h (Zweigerdt et al., 2011). An aliquot of EBs was transferred into a 15 ml falcon tube and EBs were sedimented (10 min). EB volume of the aliquot was estimated according to falcon tube scale and EB volume of the entire preparation was calculated. Mesodermal differentiation was induced in suspension culture on Pluronic® F-127 (Sigma-Aldrich, P2443; 1% in PBS, 37 °C, overnight) coated T175 flasks (200 µl EBs/40 ml medium) for three days with daily medium change of 50% of the volume (37 °C, 5% CO<sub>2</sub>, 5% O<sub>2</sub>). The medium consisted of RPMI 1640 (Gibco, 21875), 4 mg/ml PVA, 0.5% penicillin/streptomycin, 10 mM HEPES (pH 7.4; Roth, 9105.4), 0.05% human serum albumin, 5 mg/l transferrin, 5 µg/l selenium, 10 µM Y-27632, 0.1% Lipid-Mix, 250 µM 2-phospho-L-ascorbic acid trisodium salt (Sigma-Aldrich, 49752), 10 ng/ml BMP-4 (R&D Systems, 314-BP), 3 ng/ml activin-A, 5 ng/ml FGF2. Cardiac differentiation was performed either in suspension culture or in adhesion culture (Figure 1) with a medium consisting of RPMI 1640, 0.5% penicillin/streptomycin, 10 mM HEPES, 1% transferrin-selenium, 1 µM Y-27632, 0.05% Lipid-Mix, 250 µM 2-phospho-L-ascorbic acid trisodium salt, 0.1% human serum albumin, 100 nM Wnt-inhibitor DS-07 (4-(*cis-endo*-1,3-dioxooctahydro-2*H*-4,7-methanoisindol-2-yl)-*N*-(quinolin-8-yl)-*trans*-cyclo-hexylcarboxamide; (Lanier et al., 2012); 37 °C, 5% CO<sub>2</sub>, 21% O<sub>2</sub>). For adhesion culture EBs were transferred to Geltrex® coated vessels and evenly distributed (100 µl EBs/T75 flask). For suspension culture the EBs were left in the Pluronic® coated vessels. The attached or suspended colonies were cultured for three days with medium change only on day 2 and 3. For the next four days the cells were cultured in RPMI 1640 supplemented with 0.5% penicillin/streptomycin, 10 mM HEPES, 500 µM 1-thioglycerol (Sigma, M6145), 1 µM Y-27632, 2% B-27 supplement (Gibco, 17504-044), 100 nM DS-07 (37 °C, 5% CO<sub>2</sub>, 21% O<sub>2</sub>). Spontaneous beating usually occurred around day 9-11 of cardiac differentiation. For the following 4-5 days the beating colonies were cultured in the same medium composition without the addition of the WNT-inhibitor DS-07.

### *Flow cytometry (FACS) analysis*

HiPSC-cardiomyocytes were dissociated to single-cell suspensions with collagenase 2 (200 U/ml, Worthington, LS004176 in HBSS minus Ca<sup>2+</sup>/Mg<sup>2+</sup>, Gibco, 14175-053) for 4 h at 37 °C. Cells were fixed with ice-cold methanol for 20 min at 4 °C and the cell membrane permeabilized in FACS buffer containing 0.5% saponine. Intracellular proteins were stained successively with primary and secondary antibodies in FACS buffer containing 0.5% saponine for 30 min at 4 °C. The following antibodies were used: alpha-actinin (Sigma-Aldrich, A7811, 1:800), MLC2a (Synaptic Systems, 311011, 1:100), MLC2v (Proteintech, 10906-1-AP, 1:100), troponin T (Abcam, ab45932, 1:800), Alexa Fluor® 488 anti-rabbit (Life technologies, A-11034, 1:800), Alexa Fluor® 488 anti-mouse (Life technologies, A-11001, 1:800). For negative control we used isotype antibodies (Figure S1B): anti-mouse IgG1 for alpha-actinin and troponin T and anti-mouse IgG2b for MLC2a. Samples were analyzed with a BD FACSCanto II Flow Cytometer and the BD FACSDiva Software 6.0.

### *Quantitative PCR*

Samples were taken on day 0, between day 2 and day 16 every other day and on day 20 of differentiation. For each time point, four differentiation runs were analysed. RNA was isolated after proteinase K digestion with the RNeasy Kit (Qiagen) according to manufacturer's instructions. The conversion to cDNA was performed with the High Capacity cDNA Reverse Transcription Kit (Applied Biosystems). QPCR was performed with SYBR-Green

(Fermentas) according to manufacturer's instructions in technical triplicates. Glucuronidase-beta (GUSB) was used as reference transcript for normalization. The target sequences were amplified during 40 cycles in an AbiPrism7000HT cyclor.

#### Primer sequences (5' → 3'):

| Name                                         | Gene         | Primer (forward)     | Primer (reverse)     |
|----------------------------------------------|--------------|----------------------|----------------------|
| <b>Alpha MHC</b>                             | MYH6         | TTCATTGACTTTGGCATGGA | GGCTTCTGGAAATTGTTGGA |
| <b>Beta MHC</b>                              | MYH7         | CACAGCTCTGTCCTGCTCTG | TTCTAGCCGCTCCTTCTCTG |
| <b>Cardiac troponin T (total)</b>            | TNNT2        | TTCGACCTGCAGGAGAAGTT | GAGCGAGGAGCAGATCTTTG |
| <b>Glucoronidase beta</b>                    | GUSB         | AAACGATTGCAGGGTTTCAC | CTCTCGTCGGTGACTGTTCA |
| <b>Brachyury homolog</b>                     | T            | GCAAAAGCTTTCCTTGATGC | ATGAGGATTGCAGGTGGAC  |
| <b>Islet</b>                                 | ISL1         | GTTACCAGCCACCTTGGAAA | GACTGGCTACCATGCTGTT  |
| <b>Mesoderm posterior 1 homolog</b>          | MESP         | GAAGTGGTTCCTTGGCAGAC | TCCTGCTTGCTCAAAGTGT  |
| <b>Kinase insert domain receptor, VEGFR2</b> | KDR/<br>FLK1 | GCGATGGCCTCTTCTGTAAG | ACACGACTCCATGTTGGTCA |
| <b>Oct4 POU class 5 homeobox 1</b>           | POU5F1       | CGAAAGAGAAAGCGAACCAG | GCCGGTTACAGAACCACACT |

#### *Transcriptome analysis*

For transcriptome analysis we isolated RNA from cardiomyocytes at the end of differentiation and matched cultures (21 days) of hiPSC-CM in either 2D or EHT format. Cells and EHTs were washed twice in PBS, EHTs stripped from the silicone racks, and homogenized by trituration through small steel cannulas (Braun Sterican; 21G then 27G) in lysis buffer (RNeasy® mini kit, Qiagen 74104) and digested with Proteinase K (Qiagen 19133; 56 °C, 10 min). RNA was isolated with the RNeasy® mini kit (Qiagen 74104) according to standard protocol. Array data (Illumina Human HT-12 v2) were processed on the Illumina GenomeStudio V2011.1 Platform (Gene Expression Module 1.9.0), two slides, five conditions with four to five biological replicates each (cardiomyocytes, n=4/3; cardiomyocytes 2D, n=5/3; cardiomyocytes EHT, n=6/3; NCBI GEO accession number GSE80390). The array data have been quantile normalized on probe level (47,310 probes) without background correction. Probes absent in all samples (minimum detection p-value >0.05) were rejected. The remaining set of 29,258 probes underwent parametric ANOVA statistic using Partek Genomic Suite 6.7 (Table S1). ANOVA was done by taking the batch differences into account. Multiple testing correction was performed using false discovery rate (FDR) statistic (Benjamini & Hochberg, 1995). Probes underwent 0.1% FDR (n=277) were further investigated with clustering and functional enrichment approaches. General differentiation of the cell-type specific expression profiles was performed using hierarchical clustering. The K-mean clustering with Euclidean distance function was done using standardized values. K=5 was selected according to the result of the Davies Bouldin K estimation procedure (data not shown here). Functional aspects of the differential expression was analyzed using the G:Profiler interface (Reimand et al., 2007) using g:SCS threshold as significance criterion.

#### *Histological analysis*

30-35 days old EHTs were fixed in formaldehyde (Roti®-Histofix 4%, Carl Roth, P087.3) overnight at 4 °C. After embedding in paraffin, 4 µm thick longitudinal or cross sections were processed for immunohistochemical staining (monoclonal mouse anti-MLC2v 1:200, Synaptic systems 310111; monoclonal mouse anti-dystrophin 1:200, Millipore MAB1645). For whole mount immunofluorescence staining, fixed EHTs were blocked (6 h in TBS 0.05 M pH 7.4, 10% FCS, 1% BSA, 0.5% Triton X-100), incubated in antibody solution (TBS 0.05 M pH 7.4, 1% BSA, 0.5% Triton X-100) with primary antibodies (monoclonal mouse anti-α-actinin 1:800, Sigma A7811; monoclonal

rabbit anti-MLC2v 1:200, Proteintec™, 10906-1-AP; polyclonal rabbit anti-caveolin-3 1:1000, Novus Biologicals NB110-5029; polyclonal rabbit anti-junctophilin-2 1:100, Santa Cruz sc-134875), washed repeatedly with PBS, incubated in antibody solution with secondary antibodies and other stainings (Alexa Fluor® 488 goat-anti-mouse 1:800, Invitrogen; Alexa Fluor® 488 goat-anti-rabbit 1:800, Invitrogen; Alexa Fluor® 546 goat-anti-rabbit 1:200; DRAQ5™ 1:1000, Biostatus Ltd. BOS-889-001-R050; Phalloidin Alexa Fluor® 488 1:60; Invitrogen A-12379), rinsed 3-4 times in PBS and embedded in Fluoromount-G® (SouthernBiotech, 0100-01) in dented microscope slides (Carl Roth, H884.1). 2D cultures were cultivated on coated (0.1% gelatin) glass cover slips and handled accordingly.

### *Transmission electron microscopy*

For transmission electron microscopy (TEM), EHTs were washed twice in PBS and incubated in 2-butandionemoxime (Sigma, B0753; 30 mM in PBS, 10 min, 37 °C) to relax sarcomeres and fixed overnight in glutaraldehyde (0.36%, pH 7.0-7.5, 4 °C). Fixed EHTs were removed from silicone racks and subjected to post-fixation in osmium tetroxide solution (1%, 2 h; Science Services, 19110), dehydration and embedding in a glycidether-based resin. Ultra-thin sections (50 nm) were prepared and analyzed on a Zeiss LEO 912AB.

### *Western blot*

21 days old hiPSC-EHTs were frozen in liquid nitrogen and stored at -80 °C. 70 µl of 1x M-PER™ Mammalian Protein Extraction Reagent (Thermo Scientific) supplemented with protease and phosphatase inhibitor (Roche) was used for the lysis per EHT. Age-matched hiPSC-CM 2D cultures or samples of non-failing human heart (NFH) were handled accordingly. After homogenization, 1x Laemmli buffer was added to the samples before heating at 95 °C for 5 minutes. SDS polyacrylamide gels (8-15%) were loaded with 4 µl of NFH lysate, 10 µl of 2D lysate and 20 µl of EHT lysate per lane. After separation, proteins were blotted onto PVDF or nitrocellulose membranes using the wet blot method. Membranes were cut, blocked in 5-10% low fat milk powder solution in TBS-Tween 0.1% and incubated overnight at 4 °C with primary antibodies against ERK (1:1000, mAB#4695/Cell Signaling), L-type calcium channel (1:100, ACC-013/Alomone), Na<sup>+</sup>/Ca<sup>2+</sup> exchanger-1 (1:500, ab6495/abcam), Na<sup>+</sup>/K<sup>+</sup>-ATPase (1:500, #05-369/Millipore), total phospholamban (1:5000, A010-14/Badrilla), Serca2 ATPase (1:1000, MA3-919/Thermo Scientific), Na<sup>+</sup>/H<sup>+</sup> exchanger-1 (1:500, sc-28758/SantaCruz). After washing, membranes were incubated either with anti-rabbit IgG peroxidase-conjugated secondary antibody (1:5000, A0545/Sigma) or with anti-mouse IgG peroxidase-conjugated secondary antibody (1:5000, A3682/Sigma) in 5% low fat milk powder solution in TBS-Tween 0.1% for one hour at room temperature. Pierce® ECL Western Blotting Substrate (Thermo Scientific) was used for the visualization of the bands (Figure S2).

### *Contractile analysis of human EHTs with increase in preload*

Inotropic responses to increase in preload (Frank-Starling law) of hiPSC-EHTs were determined under electrical stimulation (1-2 Hz) and perfusion in a temperature controlled (37 °C) organ bath filled with Tyrode's solution (see above, without HEPES, plus 0.3 mM ascorbic acid). Data collection and evaluation were performed with a custom-made software (BMON, G. Jäckel, Hanau) as previously described (Zimmermann et al., 2000). Preload was increased in 40 µm intervals until the force reached a plateau.

## Supplemental References

Benjamini, Y., and Hochberg, Y. (1995). Controlling the false discovery rate: a practical and powerful approach to multiple testing. *J. Roy. Statist. Soc. Ser. B* 57, 289-300.

Bohm, M., Morano, I., Pieske, B., Ruegg, J.C., Wankerl, M., Zimmermann, R., and Erdmann, E. (1991). Contribution of cAMP-phosphodiesterase inhibition and sensitization of the contractile proteins for calcium to the inotropic effect of pimobendan in the failing human myocardium. *Circ Res* 68, 689-701.

Hajjar, R.J., and Gwathmey, J.K. (1992). Cross-bridge dynamics in human ventricular myocardium. Regulation of contractility in the failing heart. *Circulation* 86, 1819-1826.

Moretti, A., Bellin, M., Welling, A., Jung, C.B., Lam, J.T., Bott-Flügel, L., Dorn, T., Goedel, A., Höhnke, C., Hofmann, F., et al. (2010). Patient-specific induced pluripotent stem-cell models for long-QT syndrome. *N Engl J Med* 363, 1397-1409.

Mulieri, L.A., Hasenfuss, G., Leavitt, B., Allen, P.D., and Alpert, N.R. (1992). Altered myocardial force-frequency relation in human heart failure. *Circulation* 85, 1743-1750.

Pieske, B., Sütterlin, M., Schmidt-Schweda, S., Minami, K., Meyer, M., Olschewski, M., Holubarsch, C., Just, H., and Hasenfuss, G. (1996). Diminished post-rest potentiation of contractile force in human dilated cardiomyopathy: Functional evidence for alterations in intracellular Ca<sup>2+</sup> handling. *J Clin Invest* 98, 764-776.

Reimand, J., Kull, M., Peterson, H., Hansen, J., and Vilo, J. (2007). g:Profiler — a web-based toolset for functional profiling of gene lists from large-scale experiments. *Nucleic Acids Res.* 35, W193-200.

Schotten, U., Ausma, J., Stellbrink, C., Sabatschus, I., Vogel, M., Frechen, D., Schoendube, F., Hanrath, P., and Allessie, M.A. (2001). Cellular mechanisms of depressed atrial contractility in patients with chronic atrial fibrillation. *Circulation* 103, 691-698.

Schwinger, R.H., Böhm, M., Koch, A., Schmidt, U., Morano, I., Eissner, H.J., Uberfuhr, P., Reichart, B., and Erdmann, E. (1994). The failing human heart is unable to use the Frank-Starling mechanism. *Circ Res* 74, 959-969.

Stoehr, A., Neuber, C., Baldauf, C., Vollert, I., Friedrich, F.W., Flenner, F., Carrier, L., Eder, A., Schaaf, S., Hirt, M.N., et al. (2014). Automated analysis of contractile force and Ca<sup>2+</sup> transients in engineered heart tissue. *Am J Physiol Heart Circ Physiol* 306, H1353-H1363.

Zimmermann, W.-H.H., Fink, C., Kralisch, D., Remmers, U., Weil, J., and Eschenhagen, T. (2000). Three-dimensional engineered heart tissue from neonatal rat cardiac myocytes. *Biotechnol Bioeng* 68, 106-114.
